# Supplementary material for: All-cause and cause-specific mortality during and following incarceration in Brazil: A retrospective cohort study
Source: PubMed Central journal article supplement (PMC8486113; doi:10.1371/journal.pmed.1003789), 2021-09-17
Supplement: pmed.1003789.s003.pdf [file pmed.1003789.s003.pdf]

| Population   |       | Facility type/location                                                  | Analyses (figure)                                                                                                                                                                                     | Reference population              |
|--------------|-------|-------------------------------------------------------------------------|-------------------------------------------------------------------------------------------------------------------------------------------------------------------------------------------------------|-----------------------------------|
| Incarcerated | Men   | Closed prisons                                                          | Age-specific (Fig. S6) and age-standardized (Fig. 3) rates; instantaneous hazard (Fig. S8) and binned age-standardized rates (Fig. S9)                                                                | Non-incarcerated men              |
|              |       | Semi-open prisons                                                       | Age-specific (Fig. S6) and age-standardized (Fig. S7) rates; instantaneous hazard (Fig. S8) and binned age-standardized rates (Fig. S9)                                                               |                                   |
|              |       | Police stations                                                         | Age-specific (Fig. S6) and age-standardized (Fig. S7) rates; instantaneous hazard (Fig. S8) and binned age-standardized rates (Fig. S9)                                                               |                                   |
|              | Boys  | Youth detention                                                         | Crude (age-specific) rates (Fig. S7); instantaneous hazard (Fig. S8) and binned rates (Fig. S9)                                                                                                       | Non-incarcerated boys (age 14-19) |
|              | Women | All facility types (closed prisons, semi-open prisons, police stations) | Age-standardized rates (Fig. 3)                                                                                                                                                                       | Non-incarcerated women            |
| Post-release | Men   | Released from prison (closed or semi-open)                              | Age-specific (Fig. S6) and age-standardized (Fig. 4) rates; instantaneous hazard (Fig. 5); Kaplan-Meier survival, cause-of-death, and time-to-death, stratified by total time incarcerated (Fig. S11) | Non-incarcerated men              |
|              | Women | Released from prison (closed or semi-open)                              | Age-specific (Fig. S10A) and age-standardized (Fig. 4) rates; instantaneous hazard (Fig. S10B)                                                                                                        | Non-incarcerated women            |
