# Supplementary material for: All-cause and cause-specific mortality during and following incarceration in Brazil: A retrospective cohort study
Source: PubMed Central journal article supplement (PMC8486113; doi:10.1371/journal.pmed.1003789), 2021-09-17

## Semi-Open Prison

| Cause                     | N   | Rate per 100K | IRR (95% CI)  |
|---------------------------|-----|---------------|---------------|
| All causes                | 117 | 761.5         | 2.4 (2–2.8)   |
| Violence                  | 57  | 370.5         | 7.3 (5.5–9.5) |
| Suicide                   | 4   | 26.1          | 1.7 (0.5–4.3) |
| Non-communicable diseases | 26  | 169.5         | 1.3 (0.8–1.9) |
| Communicable diseases     | 8   | 52.2          | 1.9 (0.8–3.7) |
| Other                     | 22  | 143.3         | 1.5 (1–2.3)   |

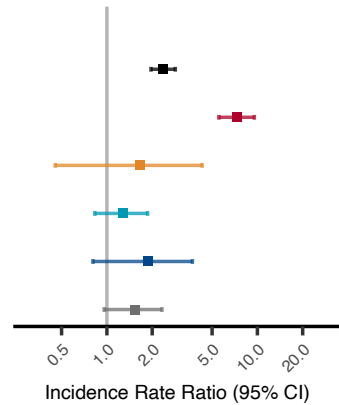

## Police Station Lockup

| Cause                     | N  | Rate per 100K | IRR (95% CI)    |
|---------------------------|----|---------------|-----------------|
| All causes                | 77 | 1005.6        | 3.1 (2.5–3.9)   |
| Violence                  | 31 | 399.7         | 7.9 (5.4–11.3)  |
| Suicide                   | 15 | 194           | 12.4 (6.9–20.7) |
| Non-communicable diseases | 11 | 147.6         | 1.1 (0.6–2)     |
| Communicable diseases     | 5  | 67.3          | 2.4 (0.8–5.7)   |
| Other                     | 15 | 197           | 2.1 (1.2–3.5)   |

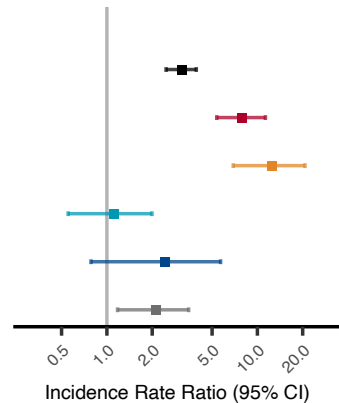

## Youth Detention

| Cause      | N  | Rate per 100K | IRR (95% CI)     |
|------------|----|---------------|------------------|
| All causes | 45 | 1079.9        | 8.1 (5.9–10.8)   |
| Violence   | 34 | 815.9         | 19.4 (13.3–27.5) |
| Suicide    | 2  | 48            | 2.9 (0.3–10.4)   |
| Other      | 9  | 216           | 4 (1.8–7.6)      |

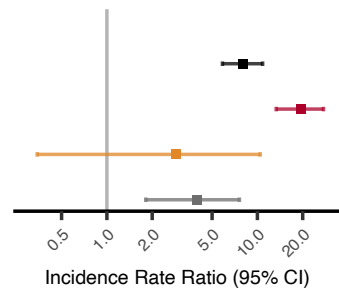

Supplement: pmed.1003789.s011.pdf [file pmed.1003789.s011.pdf]
