# Supplementary material for: All-cause and cause-specific mortality during and following incarceration in Brazil: A retrospective cohort study
Source: PubMed Central journal article supplement (PMC8486113; doi:10.1371/journal.pmed.1003789), 2021-09-17
Supplement: pmed.1003789.s012.pdf [file pmed.1003789.s012.pdf]

**A**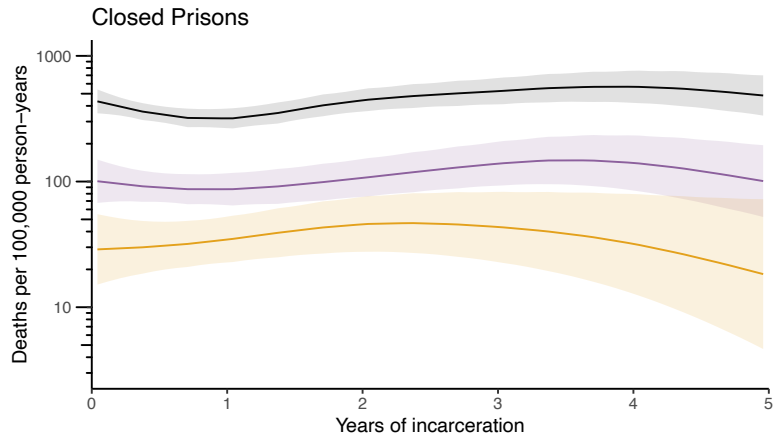**B**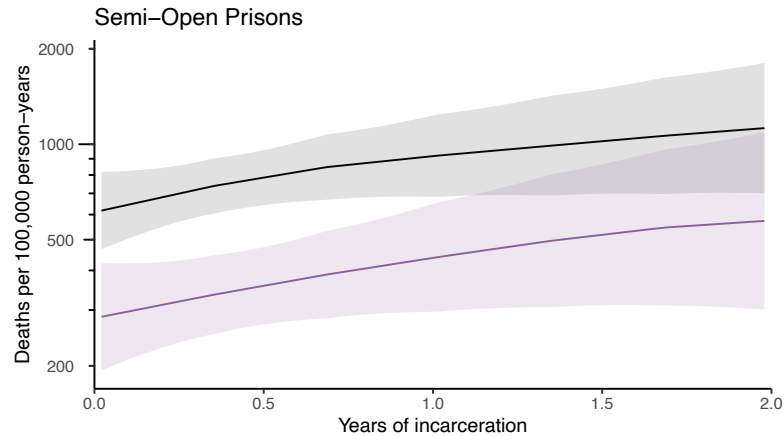**C**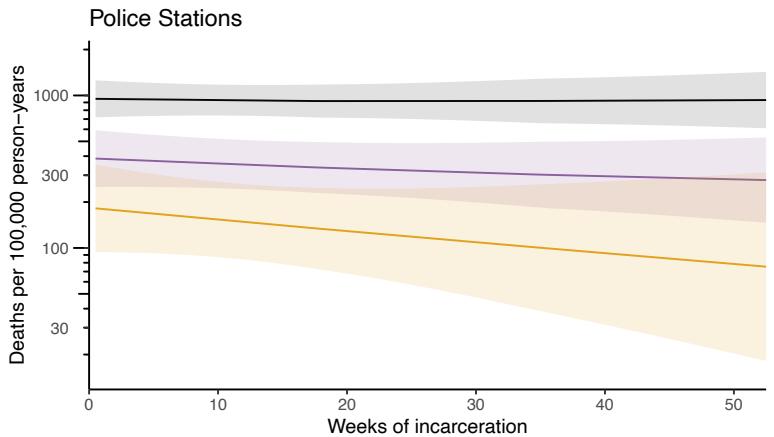**D**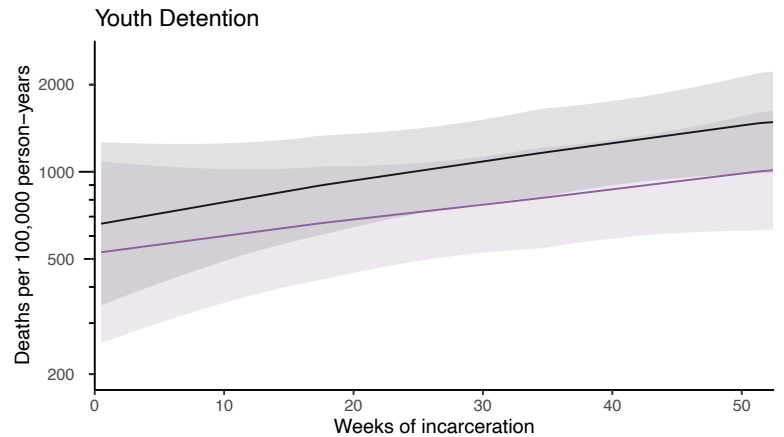

— All causes — Violence — Suicide
