# Supplementary material for: All-cause and cause-specific mortality during and following incarceration in Brazil: A retrospective cohort study
Source: PubMed Central journal article supplement (PMC8486113; doi:10.1371/journal.pmed.1003789), 2021-09-17

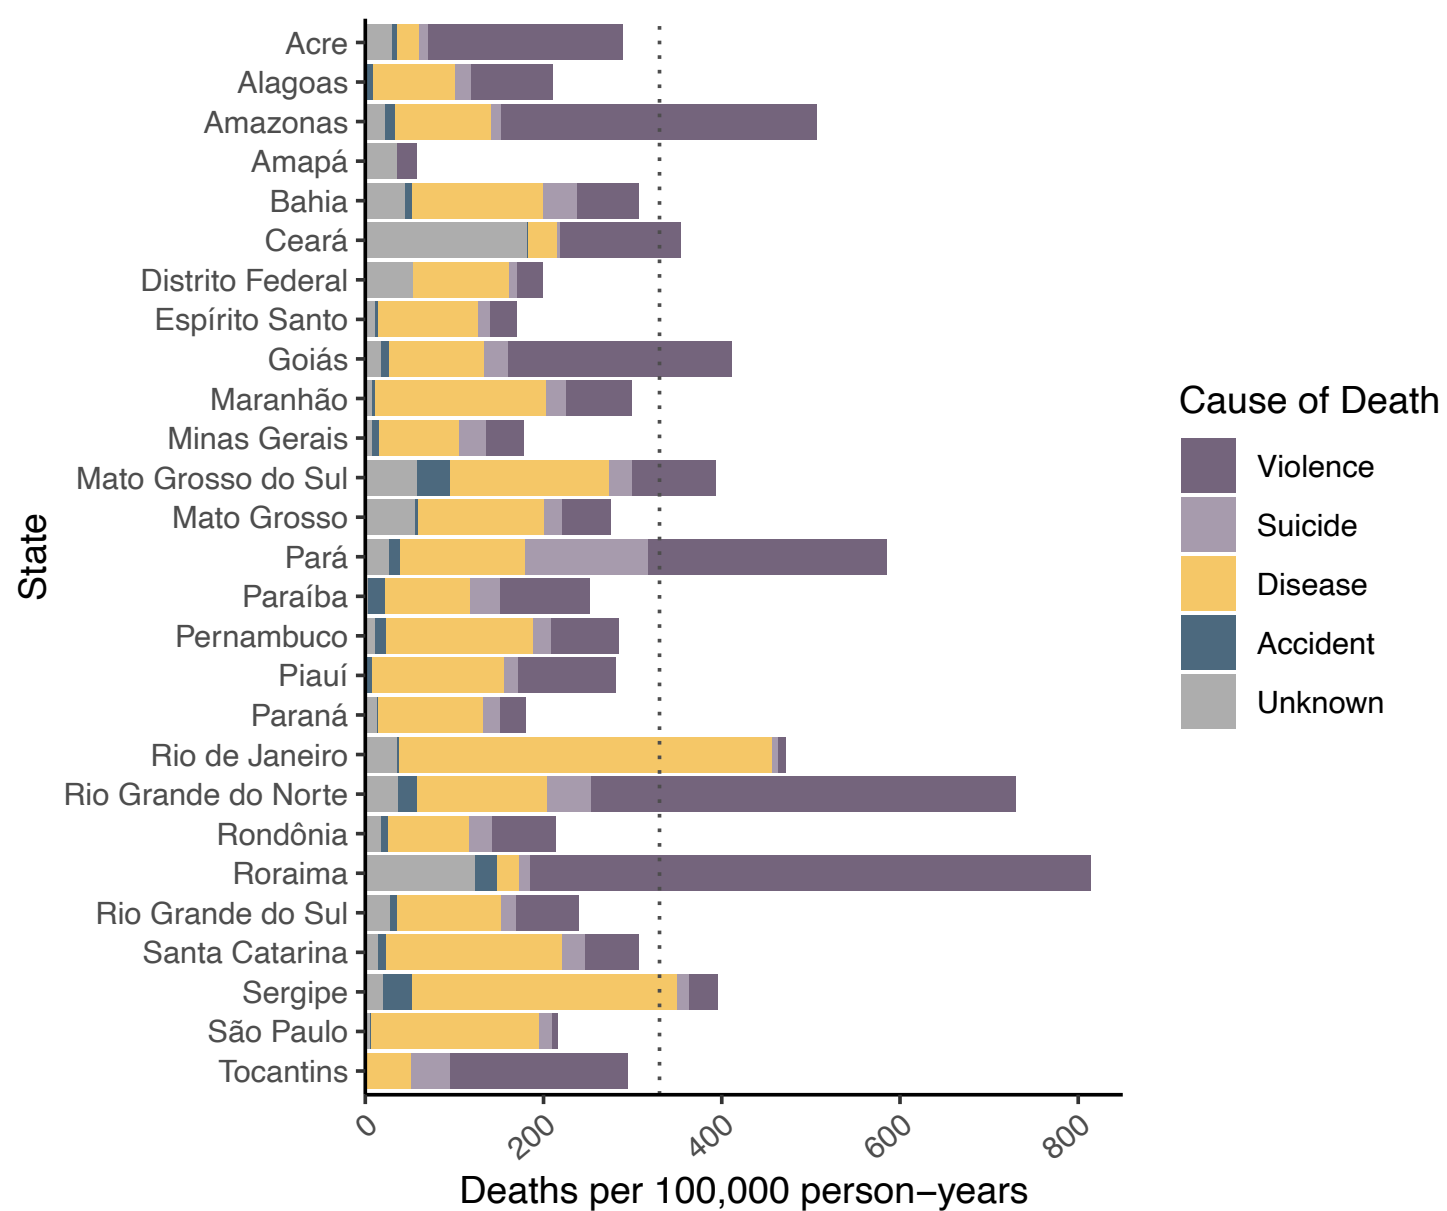

Supplement: pmed.1003789.s017.pdf [file pmed.1003789.s017.pdf]
